# Supplementary material for: Soil priming effects and involved microbial community along salt gradients
Source: Copernicus journal article supplement (doi:10.5194/bg-2023-114), 2023-08-07
Supplement: Supplementary file 1 [file bg-2023-114-supplement.pdf]

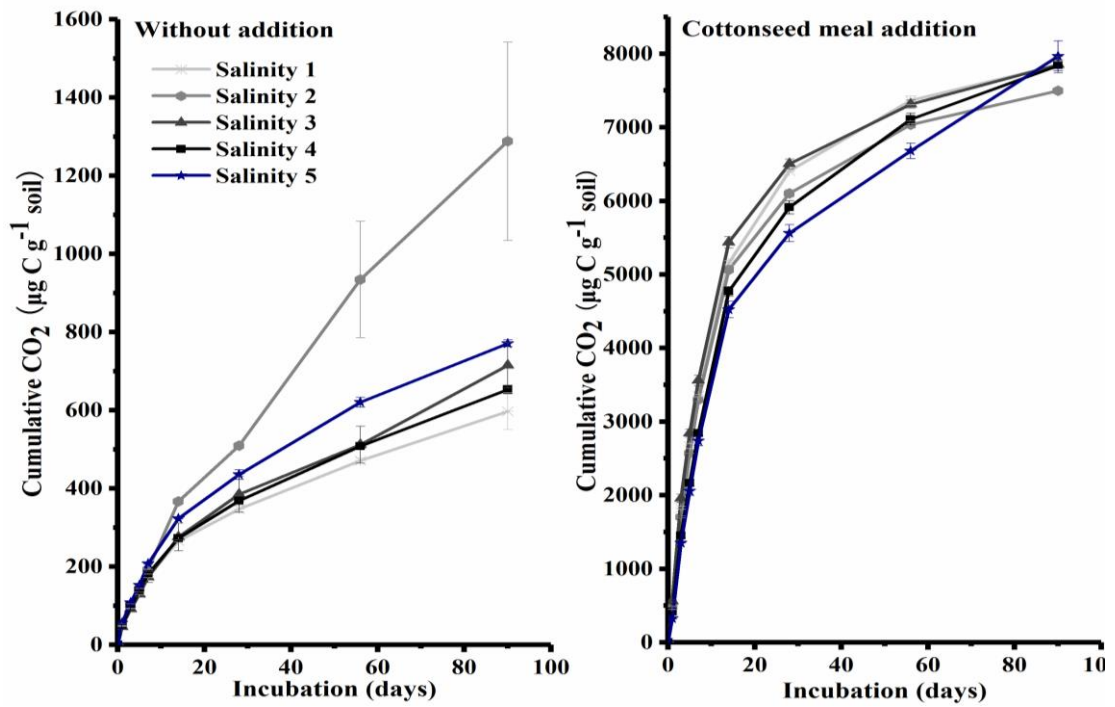

**Fig. S1.** Cumulative total amounts of CO<sub>2</sub> evolved in different five salinity soils during 90 days of incubation without addition and with cottonseed meal addition. Error bars represent standard errors of the means (n =3)

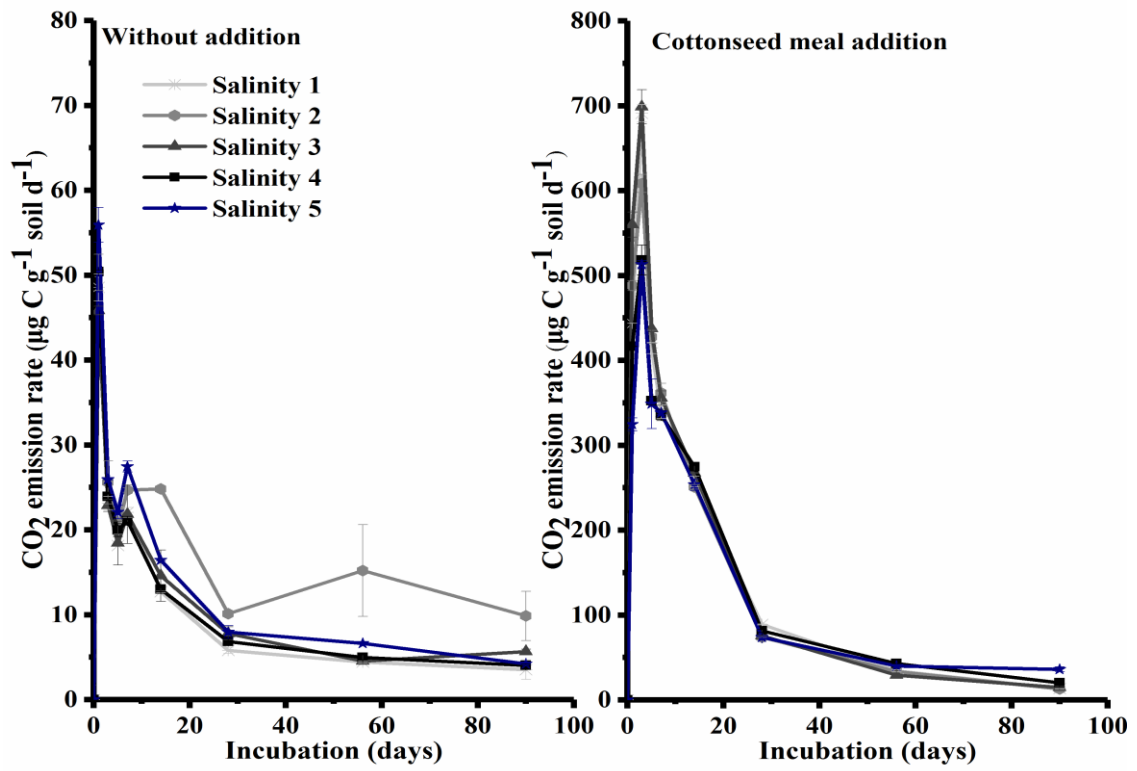

**Fig. S2.** Emission rate of CO<sub>2</sub> in different five salinity soils during 90 days incubation without addition and with cottonseed meal addition. Error bars represent standard errors of the means (n = 3).

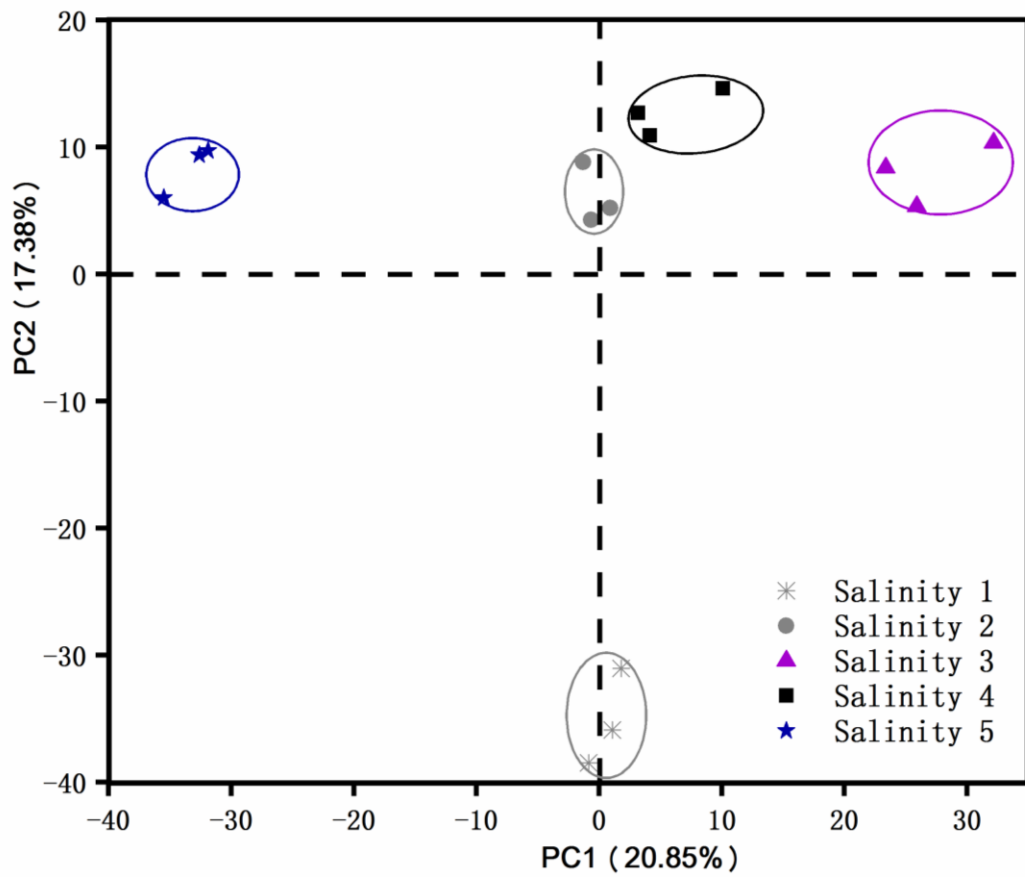

SI Fig. 3. PCA of the difference between five salinity soils, at 28 days.
